# Supplementary material
Source: PubMed Central journal article supplement (PMC4445741)
Supplement: NIHMS559732-supplement-1_si_001.pdf [file NIHMS559732-supplement-1_si_001.pdf]

## Supporting Information

Figure S1 in the supplementary data shows the effect of increasing the concentration of C6 ceramide (0 to 20 wt %) on cell cytotoxicity at 10  $\mu$ g of curcumin/ml. The cell viability was found to decrease for C6-curcumin liposomes from 41% to 1.9% as the ceramide concentration increased from 0 to 20%. Increasing the ceramide concentration substantially above 20% was found to destabilize the liposome structure; hence this level was selected for further characterization and *in vivo* study.

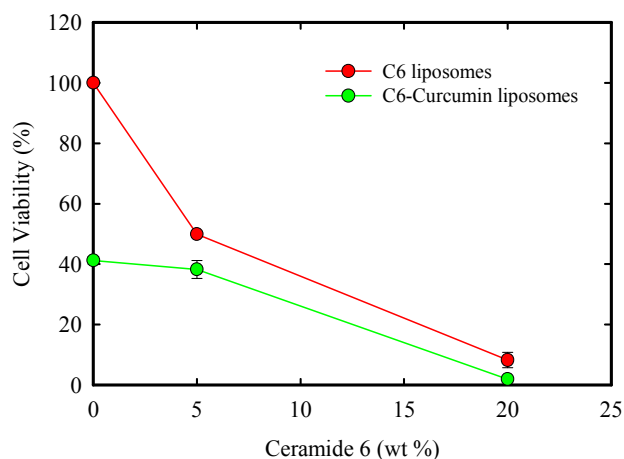

**Figure S1.** Effect of C6 Ceramide wt% at 10  $\mu$ g of curcumin/mL on KHOS.

**Table S1.** Analysis of the cell cycle arrest induced by different liposomal formulations - 12 hours data. Results are expressed as % of the total cell population.

| %              | Untreated      | Empty liposomes | Curcumin liposomes | C6 liposomes   | C6-curcumin liposomes | C6-curcumin-FA liposomes |
|----------------|----------------|-----------------|--------------------|----------------|-----------------------|--------------------------|
| G <sub>1</sub> | 41.6 $\pm$ 3.9 | 43.8 $\pm$ 2.3  | 4.3 $\pm$ 0.4      | 54.9 $\pm$ 0.7 | 23.9 $\pm$ 2.4        | 20.9 $\pm$ 0.9           |
| S              | 54.6 $\pm$ 2.7 | 53.6 $\pm$ 0.6  | 42.7 $\pm$ 0.1     | 24.7 $\pm$ 0.2 | 48.9 $\pm$ 1.8        | 45.4 $\pm$ 2.0           |
| G <sub>2</sub> | 3.7 $\pm$ 1.2  | 2.5 $\pm$ 1.7   | 52.9 $\pm$ 0.5     | 20.2 $\pm$ 0.5 | 27.1 $\pm$ 0.6        | 33.6 $\pm$ 1.1           |

**Table S2.** Analysis of the cell cycle arrest induced by different liposomal formulations - 24 hours data. Results are expressed as % of the total cell population.

| <b>%</b>             | <b>Untreated</b> | <b>Empty liposomes</b> | <b>Curcumin liposomes</b> | <b>C6 liposomes</b> | <b>C6-curcumin liposomes</b> | <b>C6-curcumin-FA liposomes</b> |
|----------------------|------------------|------------------------|---------------------------|---------------------|------------------------------|---------------------------------|
| <b>G<sub>1</sub></b> | 42.6 ± 1.9       | 43.0 ± 2.1             | 7.5 ± 0.1                 | 75.0 ± 1.3          | 27.7 ± 1.0                   | 36.5 ± 1.0                      |
| <b>S</b>             | 54.4 ± 2.7       | 55.7 ± 1.5             | 20.3 ± 0.1                | 7.7 ± 0.2           | 28.0 ± 1.6                   | 34.0 ± 1.8                      |
| <b>G<sub>2</sub></b> | 2.8 ± 0.7        | 1.1 ± 0.6              | 72.0 ± 0.1                | 17.1 ± 1.6          | 44.1 ± 0.6                   | 29.4 ± 0.8                      |

### **Generation of GFP expressing KHOS**

KHOS cells ( $10^3$  cells/cm<sup>2</sup>) were infected with GFP lentivirus (MOI: 40) supplemented with 7µg/ml Polybrene (Millipore, MA). The vector pNL-EGFP/CMV-WPREdU3, was kindly obtained from Dr. Robert Kutner at the Louisiana State University Vector Core Facility. Two days after infection, GFP expressing cells were sorted by FACS to obtain a population of >98% GFP positive KHOS cells.
